# Supplementary material for: Design of Bio-Responsive Hyaluronic Acid–Doxorubicin Conjugates for the Local Treatment of Glioblastoma
Source: MDPI journal article supplement (doi:10.3390/pharmaceutics14010124), 2022-01-05
Supplement: s1 [file s1]

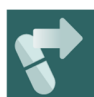

# Supplementary Materials: Design of Bio-Responsive Hyaluronic Acid-Doxorubicin Conjugates for the Local Treatment of Glioblastoma

Alessio Malfanti, Giuseppina Catania, Quentin Degros, Mingchao Wang, Mathilde Bausart, Véronique Pr  at

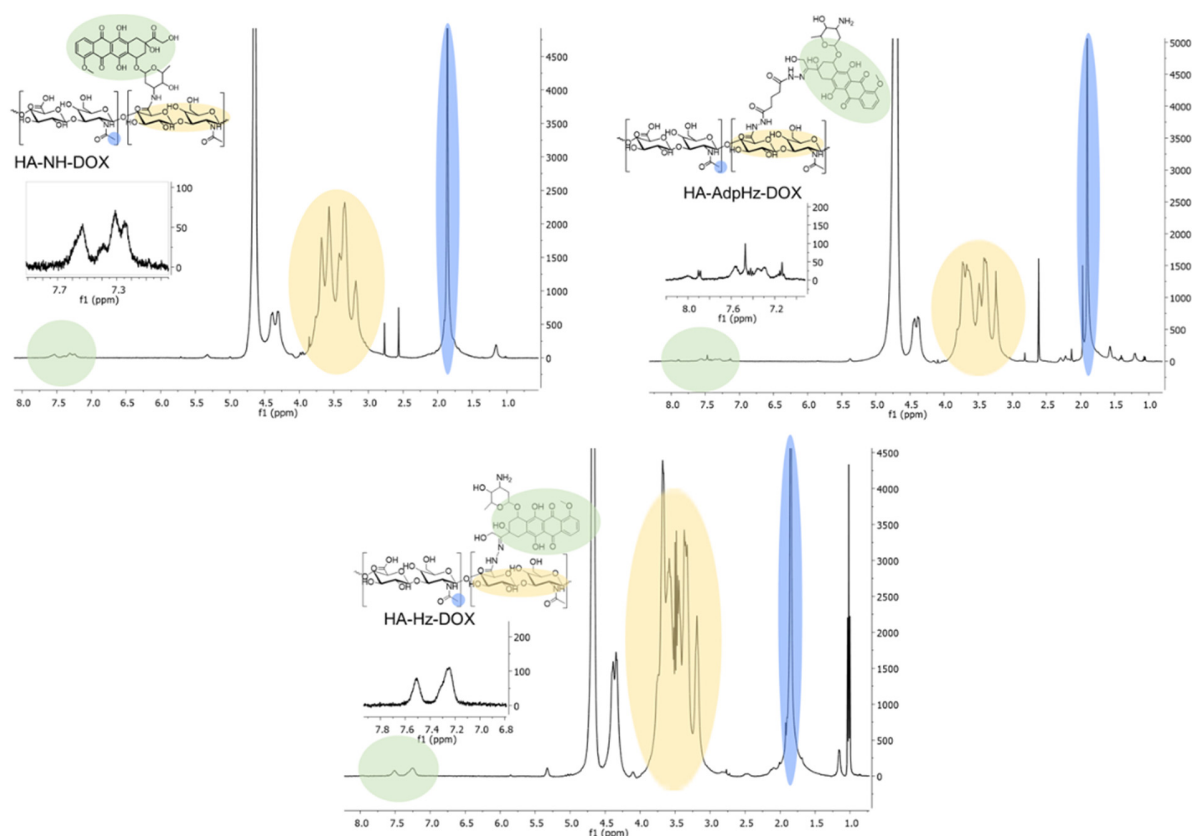

**Figure S1.** Representative <sup>1</sup>H NMR spectra (D<sub>2</sub>O, 400 MHz) of HA-DOX conjugates used in the study.

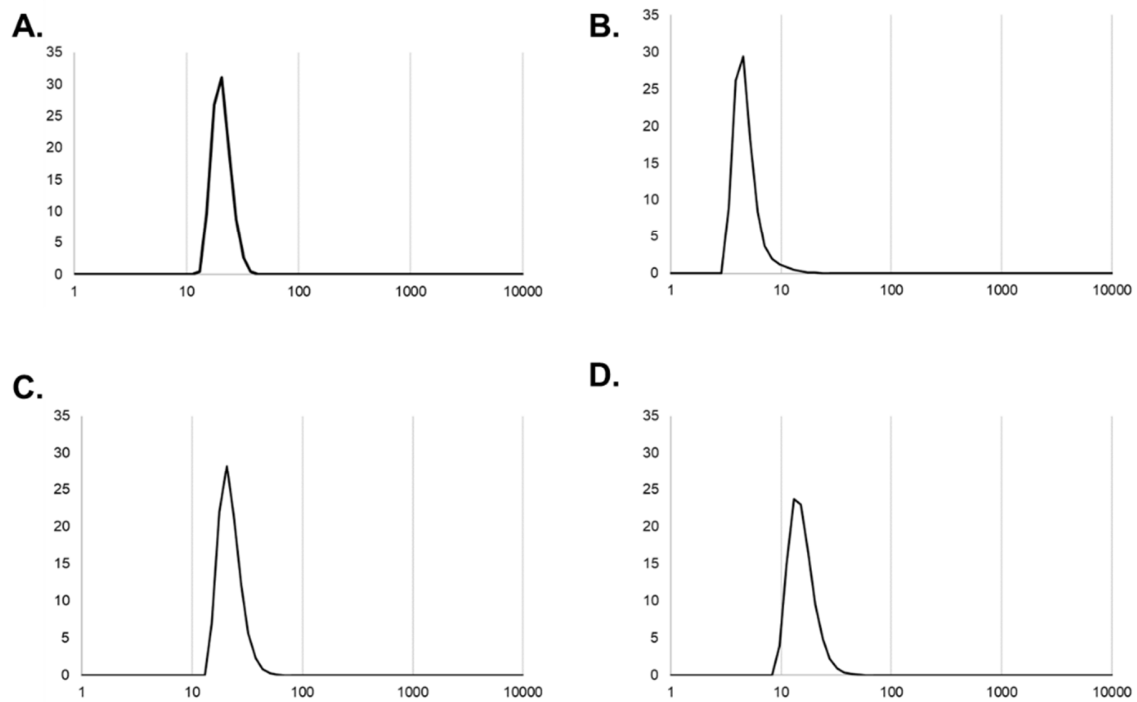

**Figure S2.** Representative Dynamic Light Scattering profiles of **A.** Hyaluronic acid; **B.** HA-NH-DOX; **C.** HA-AdpHz-DOX and **D.** HA-Hz-DOX.

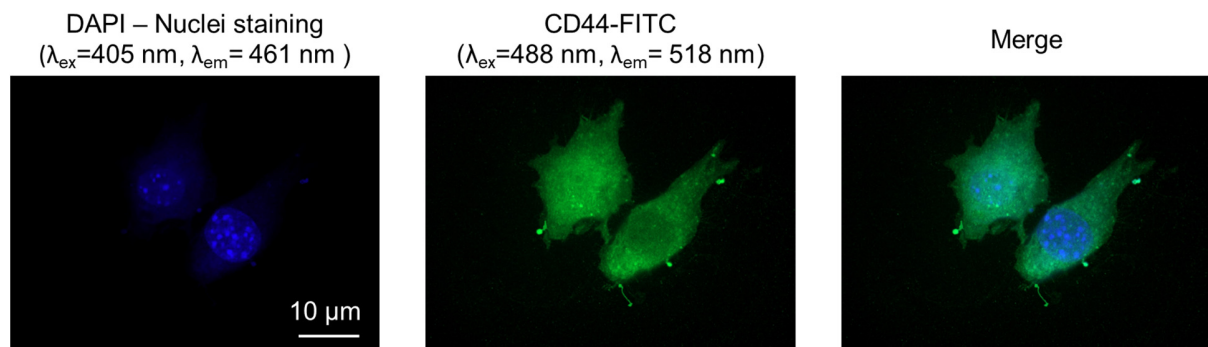

**Figure S3.** Representative confocal images of GL261 stained with FITC anti-mouse/human CD44 Antibody.

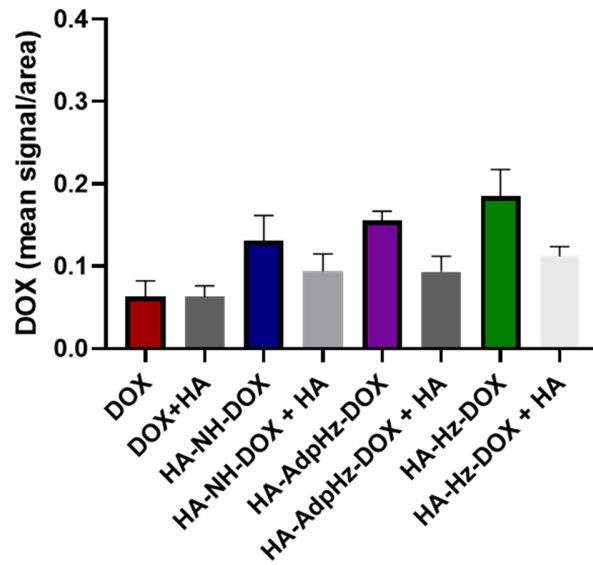

**Figure S4.** Quantification of confocal microscopy images of DOX signal from DOX and HA-DOX conjugates in GL261 in presence/absence of HA. Quantification was performed using the ImageJ programme from at least three images per treatment. Error bars represent the SD of the mean.

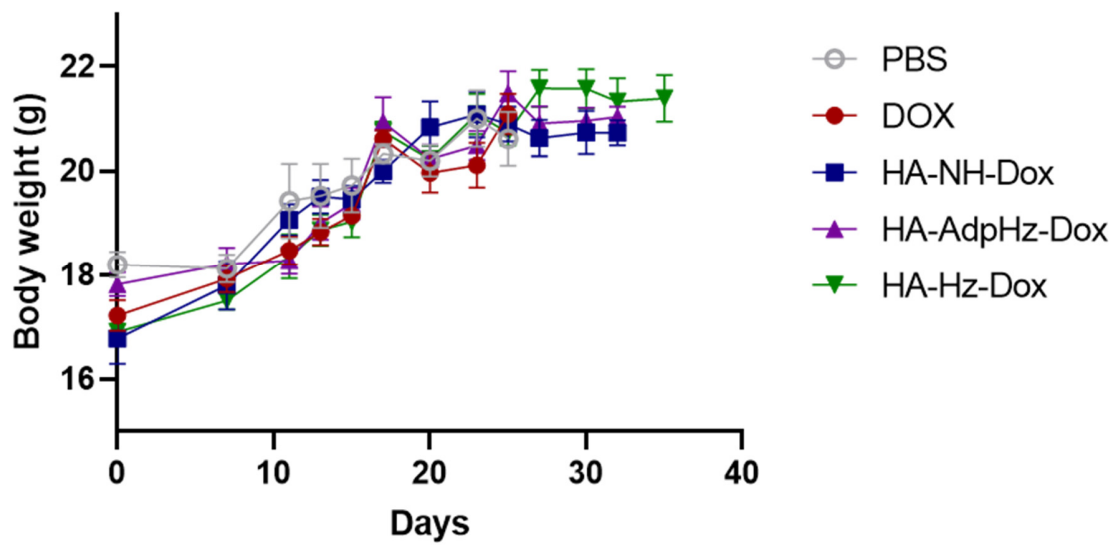

**Figure S5.** Body weight change of mice after the treatments along the time.
